# Supplementary material for: Direct calibration using atmospheric particles and performance evaluation of PSM 2.0 for sub-10 nm particle measurements
Source: Copernicus journal article supplement (doi:10.5194/egusphere-2024-2603), 2024-08-26
Supplement: Supplementary file 1 [file egusphere-2024-2603-supplement.pdf]

## Supplemental Information

# Direct calibration using atmospheric particles and performance evaluation of PSM 2.0 for sub-10 nm particle measurements

Yiliang Liu<sup>1,2</sup>, Arttu Yli-Kujala<sup>2</sup>, Fabian Schmidt-Ott<sup>2</sup>, Sebastian Holm<sup>2</sup>, Lauri Ahonen<sup>2</sup>, Tommy Chan<sup>2</sup>, Joonas Enroth<sup>3</sup>, Joonas Vanhanen<sup>3</sup>, Runlong Cai<sup>4</sup>, Tuukka Petäjä<sup>2</sup>, Markku Kulmala<sup>2</sup>, Yang Chen<sup>1</sup>, and Juha Kangasluoma<sup>2</sup>

<sup>1</sup>Chongqing Institute of Green and Intelligent Technology, CAS, Chongqing, 400714, China

<sup>2</sup>Institute for Atmospheric and Earth System Research / Physics, University of Helsinki, Helsinki, 00014, Finland

<sup>3</sup>Airmodus Ltd., Helsinki, 00560, Finland

<sup>4</sup>Department of Environmental Science & Engineering, Fudan University, Shanghai, 200438, China

*Correspondence to:* Juha Kangasluoma ([juha.kangasluoma@helsinki.fi](mailto:juha.kangasluoma@helsinki.fi)), and Yang Chen ([chenyang@cigit.ac.cn](mailto:chenyang@cigit.ac.cn))

### Contents

1. Derivation of size resolution.
2. Figure S1-S3.

The size resolution of PSM ( $Res(d_p^*)$ ) can be derived as follows:

$$\begin{aligned}
Res(d_p^*) &= d_p^* / \Delta d_p \\
&= \frac{f[S^*]}{f\left[S^* - \frac{\Delta S}{2}\right] - f\left[S^* + \frac{\Delta S}{2}\right]} \\
&= \frac{f[S^*]}{\left\{f[S^*] - f'[S^*]\frac{\Delta S}{2} + \frac{1}{2}f'[S^*]\left(\frac{\Delta S}{2}\right)^2\right\} - \left\{f[S^*] + f'[S^*]\frac{\Delta S}{2} + \frac{1}{2}f'[S^*]\left(\frac{\Delta S}{2}\right)^2\right\}} \\
&= -\frac{f[S^*]}{f'[S^*]\Delta S} \\
&= -\frac{S^*}{\Delta S} \frac{d_p^*}{f'[S^*]S^*} \\
&= Res(S^*) \frac{d_p^*}{S^*} \frac{1}{-f'[S^*]}
\end{aligned}$$

where  $d_p$  is the particle size measured by the PSM.  $S^*$  is the saturator flow rate corresponding to the peak point of the Kernel function, and  $\Delta S$  is the full width at half maximum of the Kernel function peak.  $f[S^*]$  is the fitted function displaying the cut-off size at the saturator flow rate of  $S^*$ .  $f'[S^*]$  suggests the derivation of the fitted function at the DEG saturator flow rate of  $S^*$ .

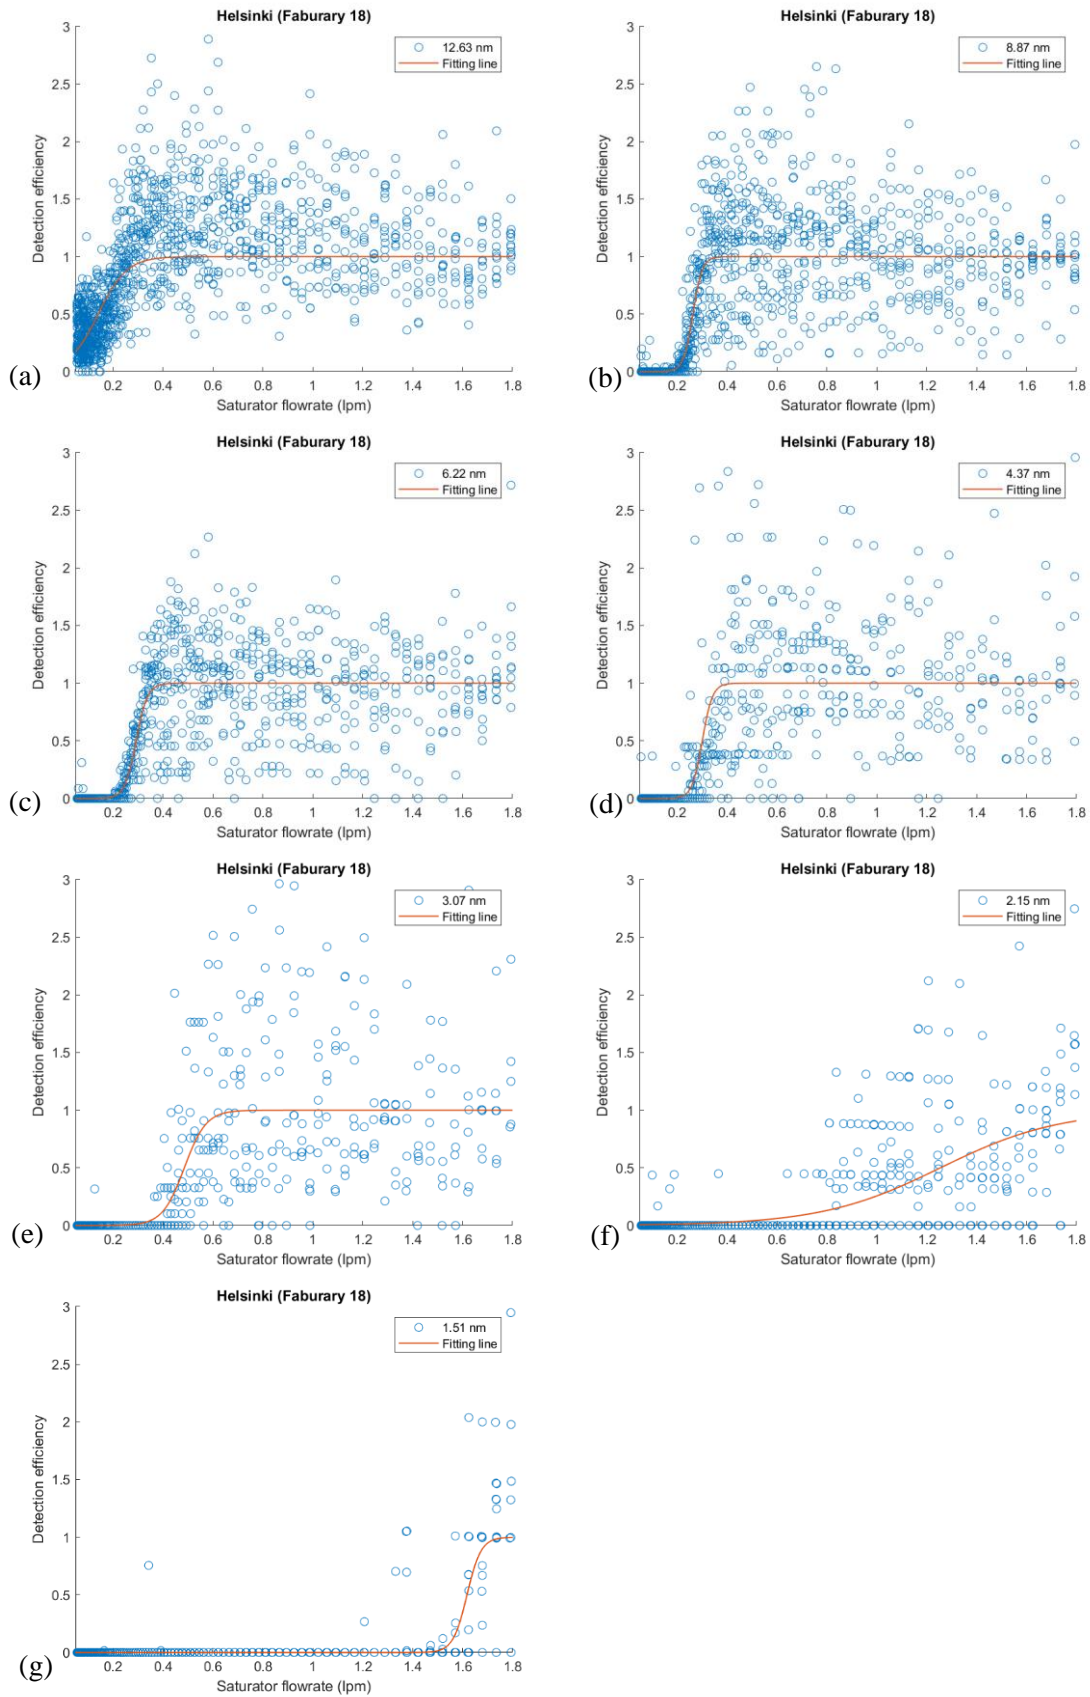

Figure S1. Detection efficiency curve for particles of different sizes collected during NPF events in Helsinki. The fitting line is derived from all measurement points.

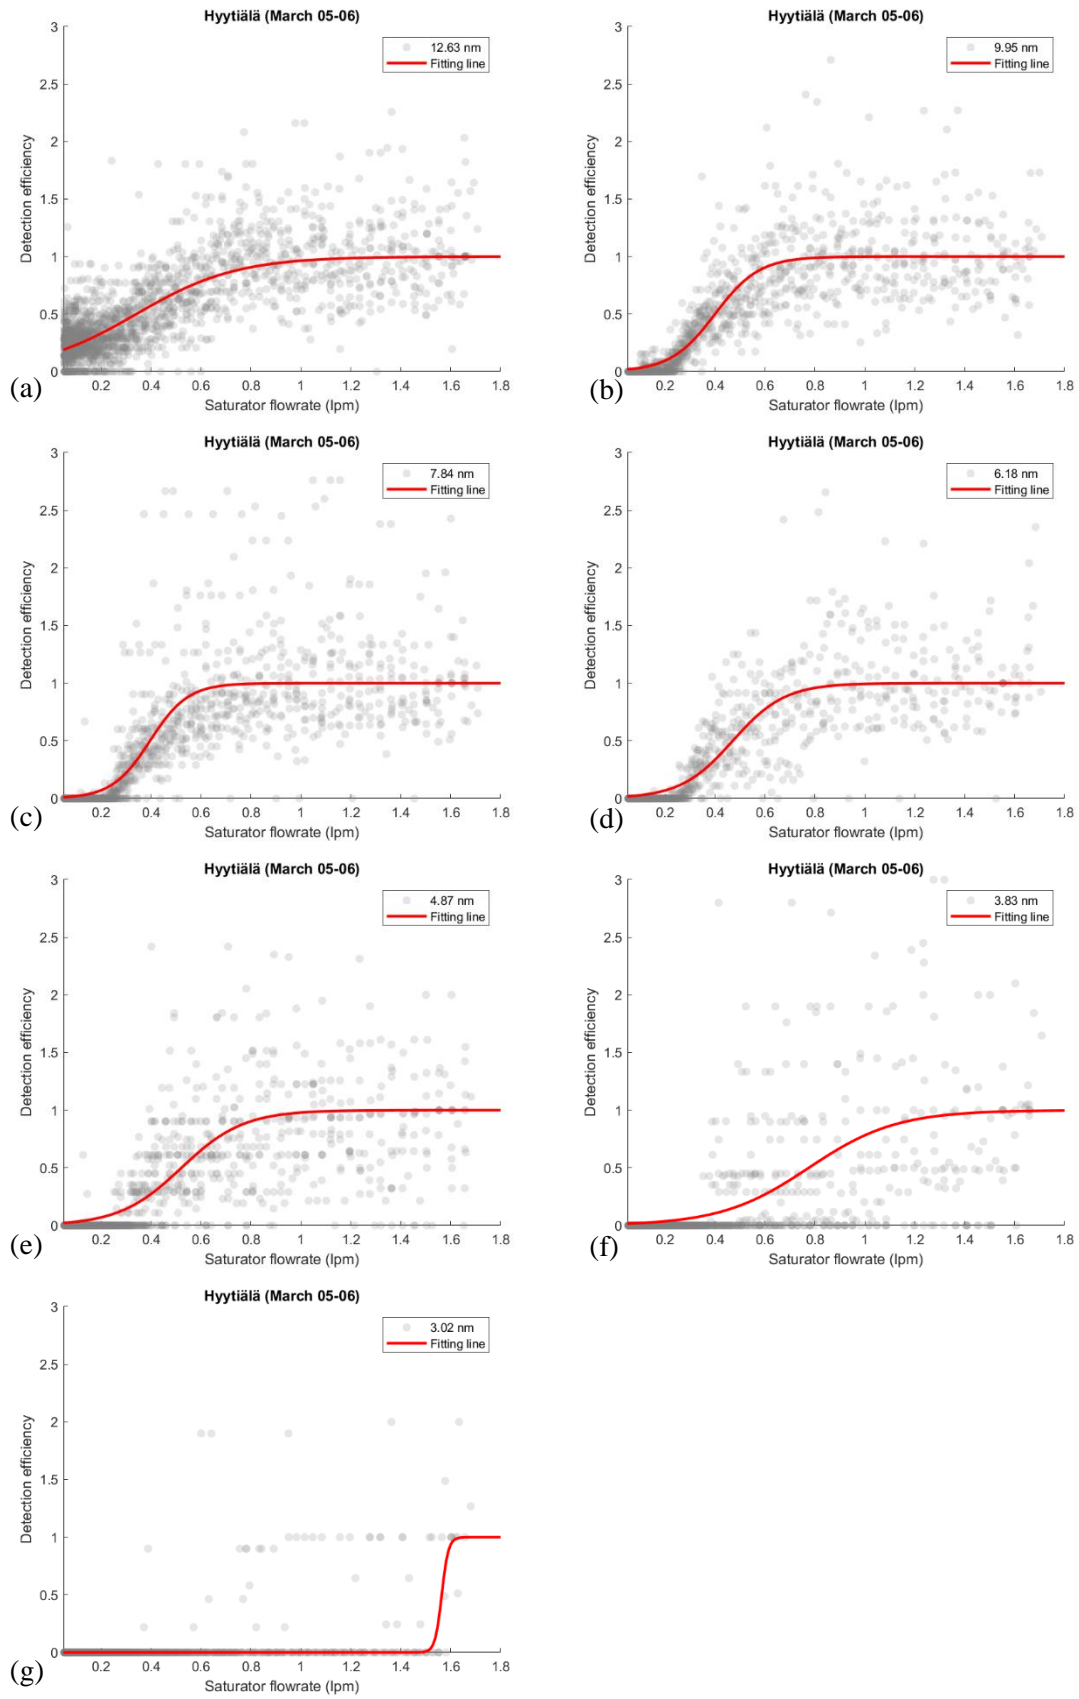

Figure S2. Detection efficiency curve for particles of different sizes collected during NPF events in Helsinki on 5 to 6 March. The fitting line is derived from all measurement points.

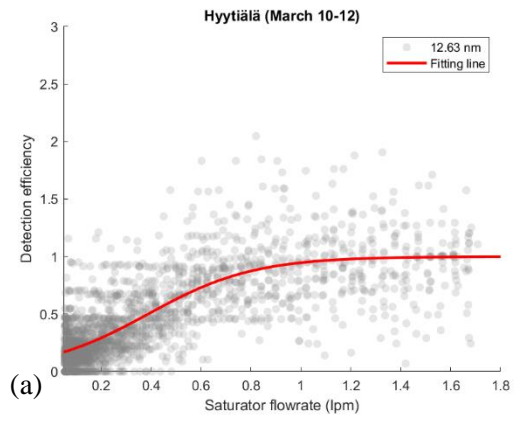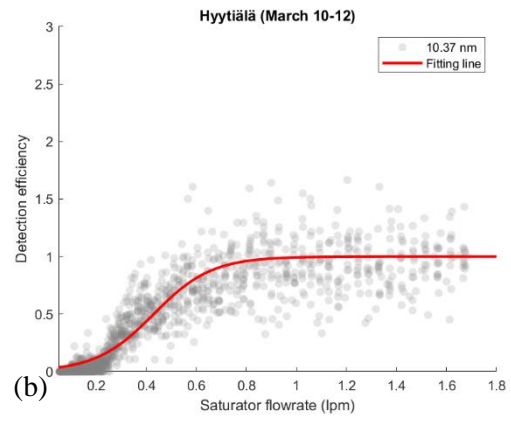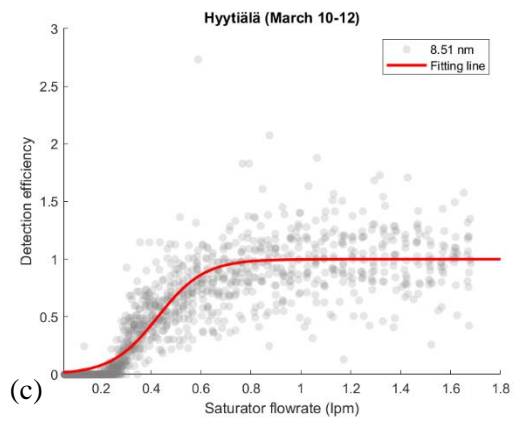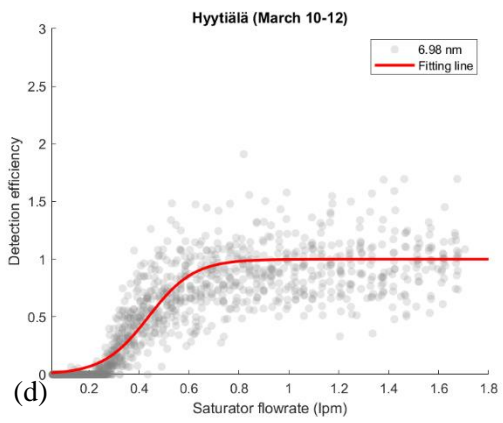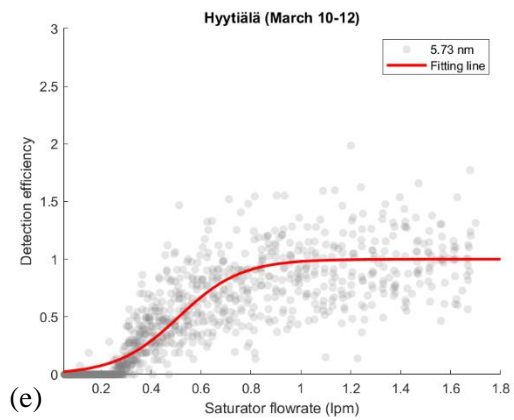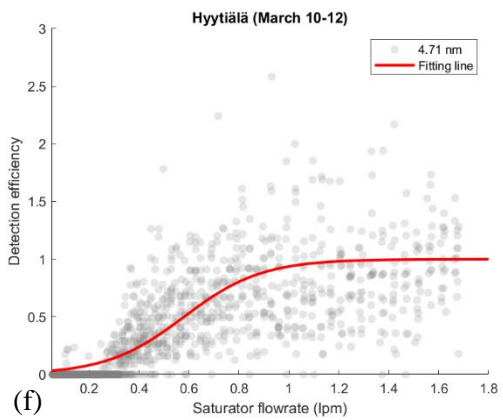

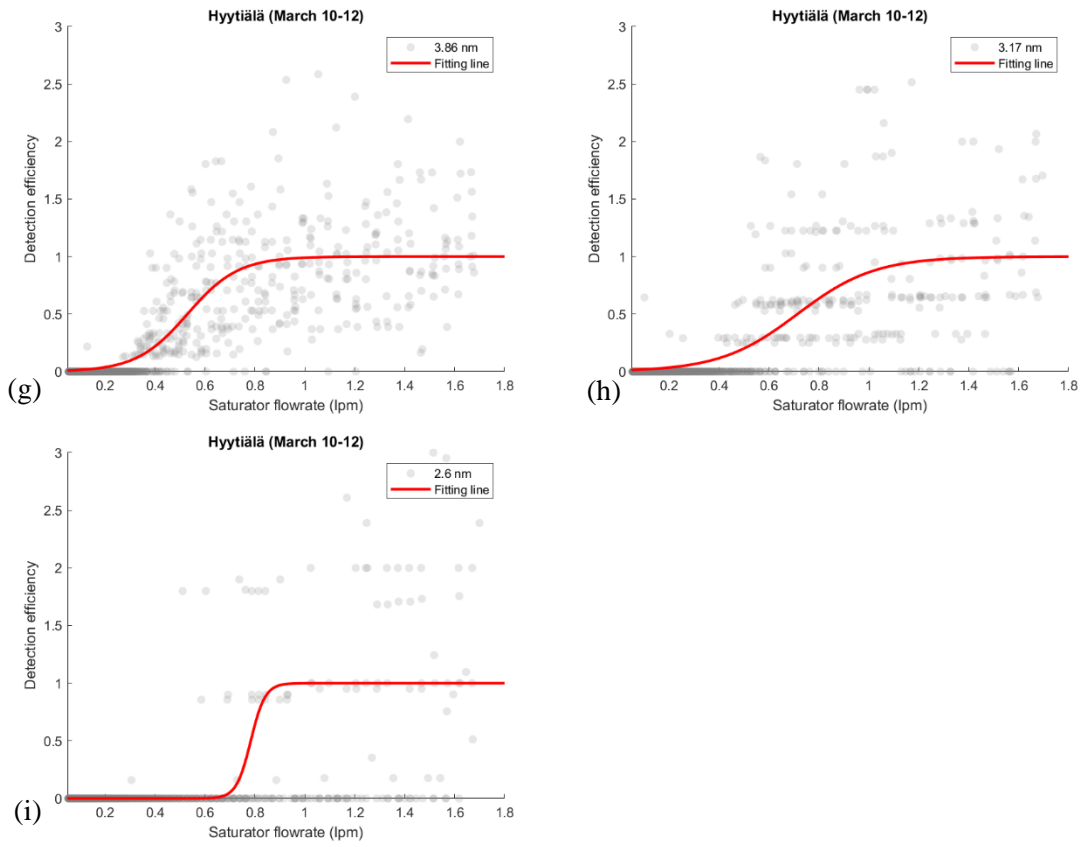

Figure S3. Detection efficiency curve for particles of different sizes collected during NPF events in Helsinki on 10 to 12 March. The fitting line is derived from all measurement points.
